# Supplementary material for: Flexibility of interval between vaccinations with AS03A-adjuvanted influenza A (H1N1) 2009 vaccine in adults aged 18–60 and >60 years: a randomized trial
Source: PubMed Central journal article supplement (PMC3522029; doi:10.1186/1471-2334-12-162), 2012-07-23
Supplement: 1471-2334-12-162-S1.pdf [file 1471-2334-12-162-S1.pdf]

**Supplementary Table 1:** Number of subjects enrolled and number of subjects excluded from per-protocol cohort analysis with rationale for exclusion at each time point

| Cohorts (n) /rationale for exclusion                                            | D0/D21     | D42        | D182       | D203*      | D364       |
|---------------------------------------------------------------------------------|------------|------------|------------|------------|------------|
| <b>Total Cohort</b>                                                             | <b>313</b> |            |            |            |            |
| Study vaccine dose not administered                                             | 7          |            |            |            |            |
| <b>Total Vaccinated Cohort (TVC)</b>                                            | <b>306</b> | <b>306</b> | <b>306</b> | <b>122</b> | <b>306</b> |
| Administration of vaccine (s) forbidden in the protocol                         | 5          | 6          | 27         | 25         | 2          |
| Study Vaccine Dose not administered according to protocol                       | 0          | 1          | 1          | 0          | 1          |
| Noncompliance with vaccination schedule (including wrong and unknown dates)     | 0          | 1          | 1          | 0          | 1          |
| Non-compliance with blood sampling schedule (including wrong and unknown dates) | 1          | 5          | 1          | 6          | 8          |
| Essential Serological data Missing                                              | 4          | 8          | 22         | 15         | 33         |
| <b>Total eliminations from TVC</b>                                              | <b>10</b>  | <b>21</b>  | <b>52</b>  | <b>46</b>  | <b>45</b>  |
| <b>per-protocol cohort for immunogenicity (D21/D42)</b>                         |            |            |            |            |            |
| <b>per-protocol cohort for persistence (D182/D203*/D364)</b>                    | <b>296</b> | <b>285</b> | <b>254</b> | <b>76</b>  | <b>261</b> |
| <b>per-protocol cohort for safety</b>                                           | <b>301</b> | <b>299</b> | <b>278</b> | <b>97</b>  | <b>303</b> |

\* GROUP B only
